# Supplementary material for: Chlorogermylenes and -stannylenes stabilized by diimidosulfinate ligands: synthesis, structures, and reactivity
Source: Royal Society of Chemistry journal article supplement (doi:10.1039/c7dt04390b), 2017-11-30
Supplement: c7dt04390b1.pdf [file c7dt04390b1.pdf]

Electronic Supplementary Information for the paper

Entitled

**Chlorogermynes and -Stannylenes Stabilized by Diimidosulfinate Ligands: Synthesis,  
Structures, and Reactivity**

Norio Nakata\*, Narimi Hosoda, Shintaro Takahashi, and Akihiko Ishii

*Department of Chemistry, Graduate School of Science and Engineering, Saitama University,  
Shimo-okubo, Sakura-ku, Saitama, 338-8570, Japan*

**Table of Contents**

**Figure S1.**  $^1\text{H}$  NMR chart of chlorogermylene **1** (400 MHz,  $\text{C}_6\text{D}_6$ , 300 K).

**Figure S2.**  $^{13}\text{C}\{^1\text{H}\}$  NMR chart of chlorogermylene **1** (101 MHz,  $\text{C}_6\text{D}_6$ , 300 K).

**Figure S3.**  $^1\text{H}$  NMR chart of chlorostannylene **2** (400 MHz,  $\text{C}_6\text{D}_6$ , 300 K).

**Figure S4.**  $^{13}\text{C}\{^1\text{H}\}$  NMR chart of chlorostannylene **2** (101 MHz,  $\text{C}_6\text{D}_6$ , 300 K).

**Figure S5.**  $^{119}\text{Sn}\{^1\text{H}\}$  NMR chart of chlorostannylene **2** (186 MHz,  $\text{C}_6\text{D}_6$ , 300 K).

**Figure S6.**  $^1\text{H}$  NMR chart of chlorogermylene-thione **3** (400 MHz,  $\text{C}_6\text{D}_6$ , 300 K).

**Figure S7.**  $^{13}\text{C}\{^1\text{H}\}$  NMR chart of chlorogermylene-thione **3** (101 MHz,  $\text{C}_6\text{D}_6$ , 300 K).

**Figure S8.**  $^1\text{H}$  NMR chart of chlorogermylene-selone **4** (400 MHz,  $\text{C}_6\text{D}_6$ , 300 K).

**Figure S9.**  $^{13}\text{C}\{^1\text{H}\}$  NMR chart of chlorogermylene-selone **4** (101 MHz,  $\text{C}_6\text{D}_6$ , 300 K).

**Figure S10.**  $^{77}\text{Se}\{^1\text{H}\}$  NMR chart of chlorogermylene-selone **4** (95.4 MHz,  $\text{C}_6\text{D}_6$ , 300 K).

**Figure S11.**  $^1\text{H}$  NMR chart of 1,3,2,4-dithiadistannetane **5** (400 MHz,  $\text{C}_6\text{D}_6$ , 300 K).

**Figure S12.**  $^{13}\text{C}\{^1\text{H}\}$  NMR chart of 1,3,2,4-dithiadistannetane **5** (101 MHz,  $\text{C}_6\text{D}_6$ , 300 K).

**Figure S13.**  $^{119}\text{Sn}\{^1\text{H}\}$  NMR chart of 1,3,2,4-dithiadistannetane **5** (186 MHz,  $\text{C}_6\text{D}_6$ , 300 K).

**Figure S14.**  $^1\text{H}$  NMR chart of 1,3,2,4-diselenadistannetane **6** (400 MHz,  $\text{C}_6\text{D}_6$ , 300 K).

**Figure S15.**  $^{13}\text{C}\{^1\text{H}\}$  NMR chart of 1,3,2,4-diselenadistannetane **6** (101 MHz,  $\text{C}_6\text{D}_6$ , 300 K).

**Figure S16.**  $^{77}\text{Se}\{^1\text{H}\}$  NMR chart of 1,3,2,4-diselenadistannetane **6** (95.4 MHz,  $\text{C}_6\text{D}_6$ , 300 K).

**Figure S17.**  $^{119}\text{Sn}\{^1\text{H}\}$  NMR chart of 1,3,2,4-diselenadistannetane **6** (186 MHz,  $\text{C}_6\text{D}_6$ , 300 K).

**Figure S18.**  $^1\text{H}$  NMR chart of 1,3-bis(chlorogermylene) **7** (400 MHz,  $\text{C}_6\text{D}_6$ , 300 K).

**Figure S19.**  $^{13}\text{C}\{^1\text{H}\}$  NMR chart of 1,3-bis(chlorogermylene) **7** (101 MHz,  $\text{C}_6\text{D}_6$ , 300 K).

**Figure S20.**  $^1\text{H}$  NMR chart of 1,3-bis(chlorostannylene) **8** (400 MHz,  $\text{C}_6\text{D}_6$ , 300 K).

**Figure S21.**  $^{13}\text{C}\{^1\text{H}\}$  NMR chart of 1,3-bis(chlorostannylene) **8** (101 MHz,  $\text{C}_6\text{D}_6$ , 300 K).

**Figure S22.**  $^{119}\text{Sn}\{^1\text{H}\}$  NMR chart of 1,3-bis(chlorostannylene) **8** (186 MHz,  $\text{C}_6\text{D}_6$ , 300 K).

**Figure S23.**  $^1\text{H}$  NMR chart of intermediate **X** (500 MHz,  $\text{C}_6\text{D}_6$ , 300 K).

**Figure S24.**  $^{119}\text{Sn}\{^1\text{H}\}$  NMR chart of intermediate **X** (186 MHz,  $\text{C}_6\text{D}_6$ , 300 K).

**Table S1.** Crystallographic Data and Details of Refinement for **1–8**.

### Computational details

**Figure S25.** Optimized geometry of *cis*-**3** [B3LYP/6-31G(d) level].

**Figure S26.** Optimized geometry of *trans*-**3** [B3LYP/6-31G(d) level].

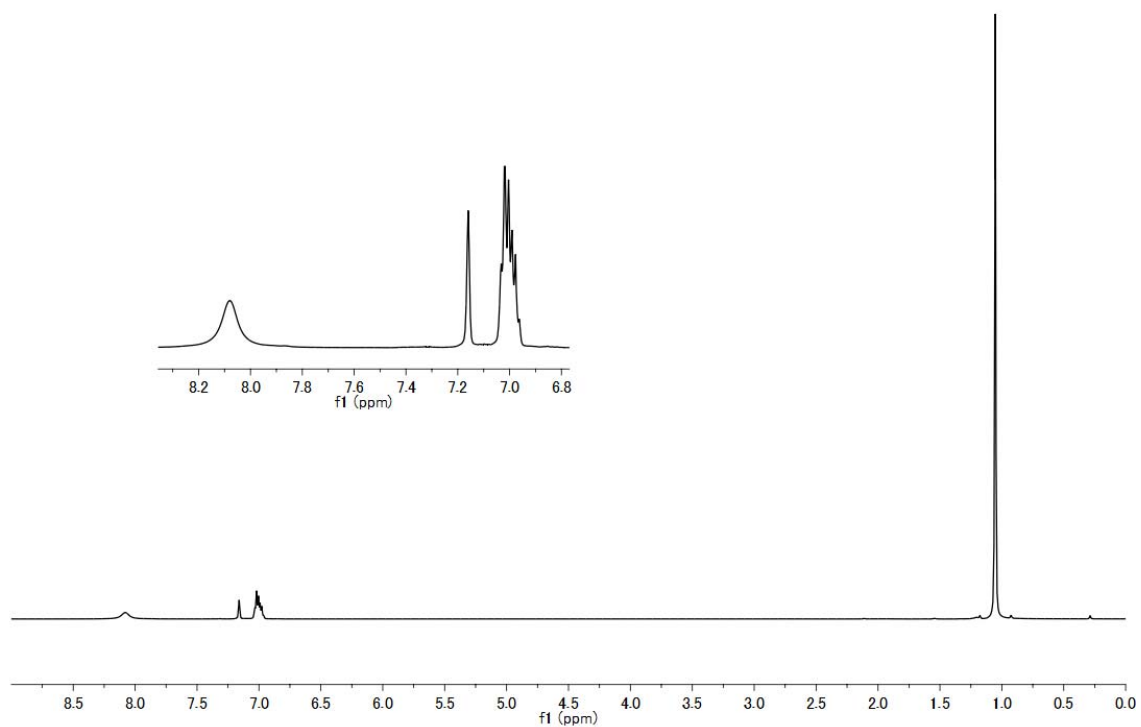

**Figure S1.**  $^1\text{H}$  NMR chart of chlorogermylene **1** (400 MHz,  $\text{C}_6\text{D}_6$ , 300 K).

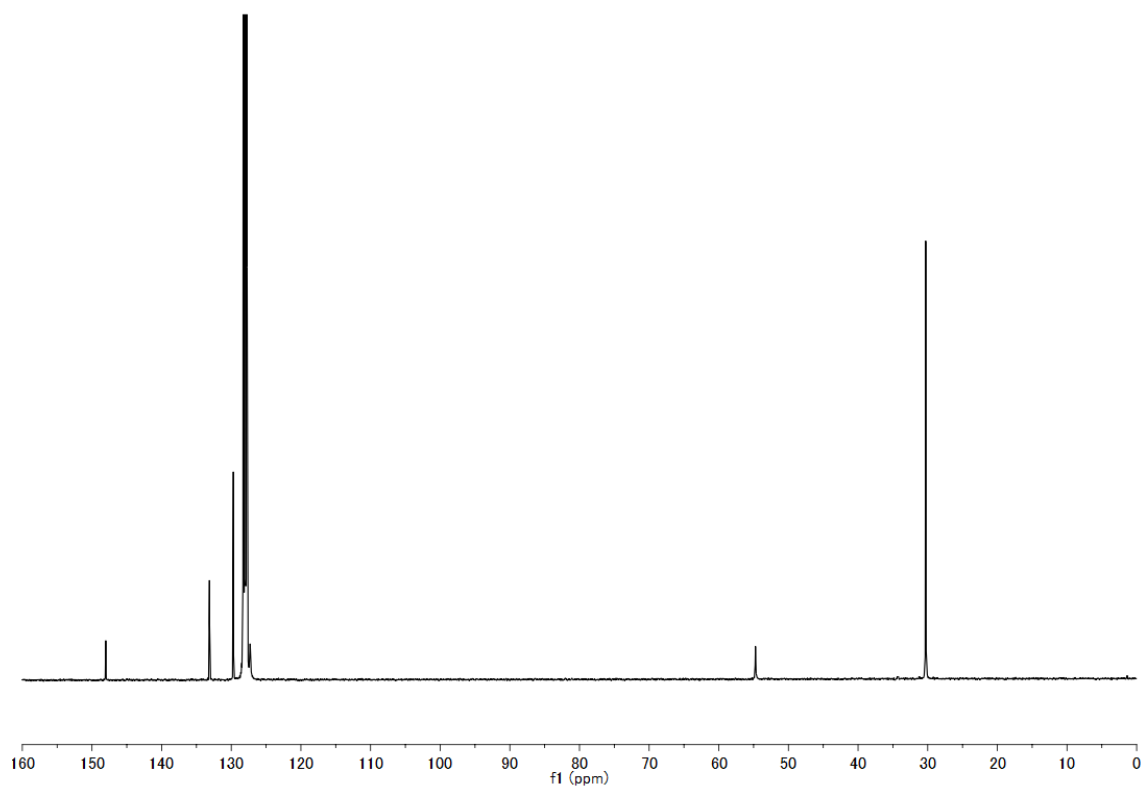

**Figure S2.**  $^{13}\text{C}\{^1\text{H}\}$  NMR chart of chlorogermylene **1** (101 MHz,  $\text{C}_6\text{D}_6$ , 300 K).

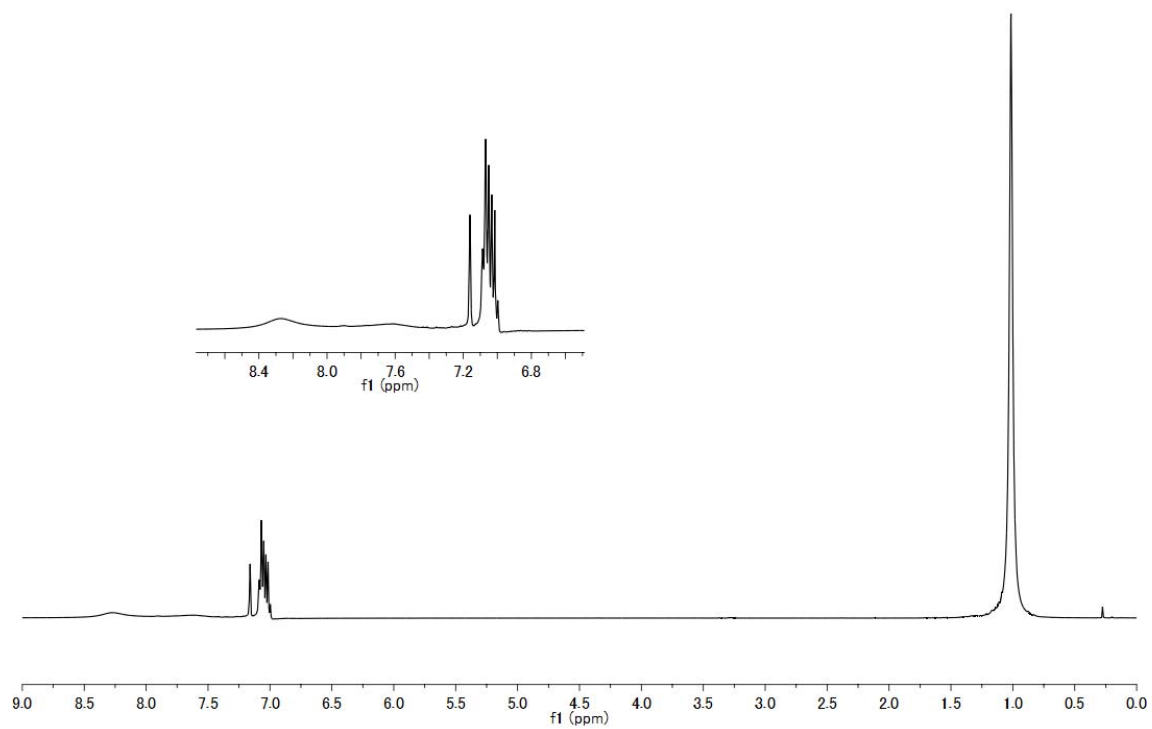

**Figure S3.**  $^1\text{H}$  NMR chart of chlorostannylene **2** (400 MHz,  $\text{C}_6\text{D}_6$ , 300 K).

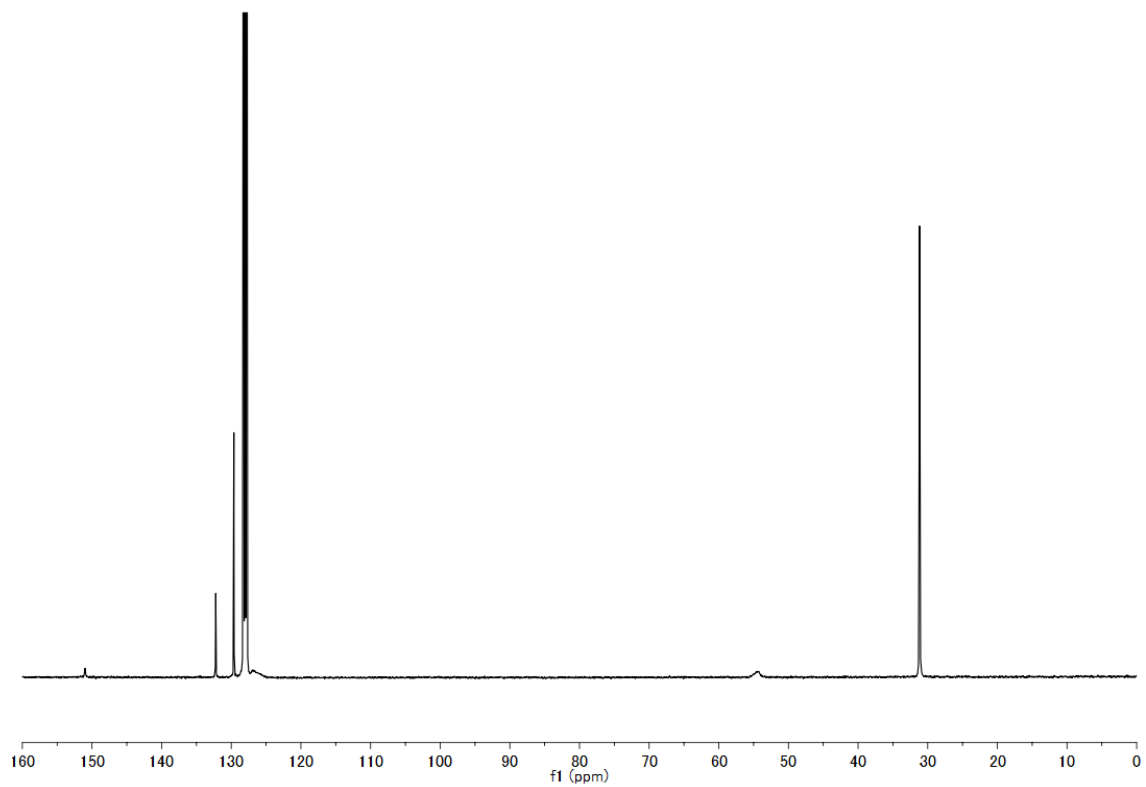

**Figure S4.**  $^{13}\text{C}\{^1\text{H}\}$  NMR chart of chlorostannylene **2** (101 MHz,  $\text{C}_6\text{D}_6$ , 300 K).

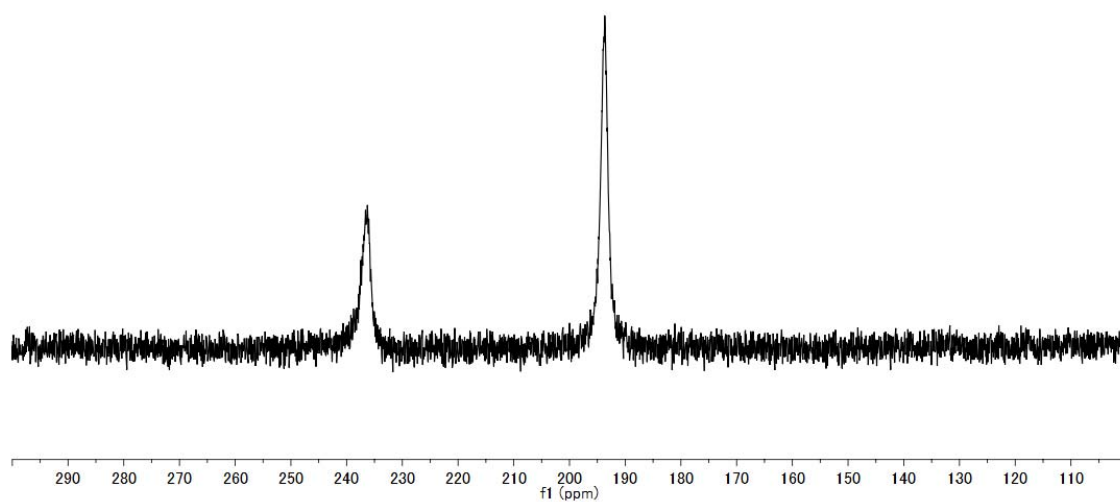

**Figure S5.**  $^{119}\text{Sn}\{^1\text{H}\}$  NMR chart of chlorostannylene **2** (186 MHz,  $\text{C}_6\text{D}_6$ , 300 K).

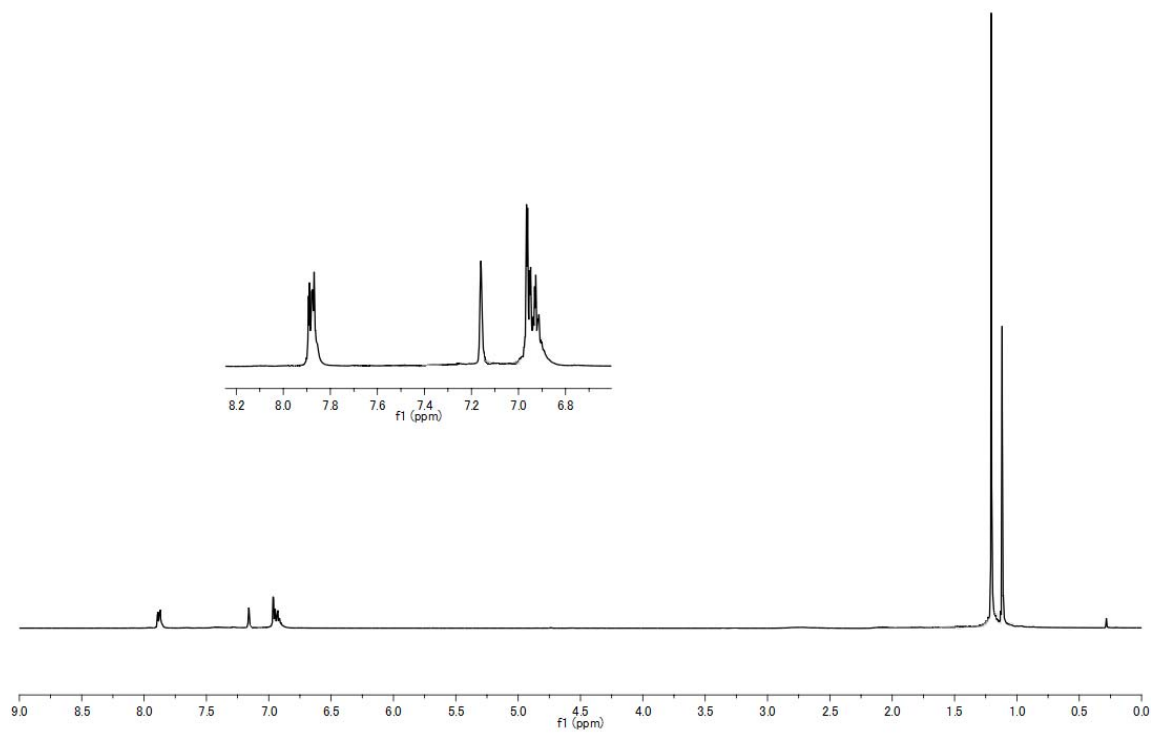

**Figure S6.**  $^1\text{H}$  NMR chart of chlorogermylene-thione **3** (400 MHz,  $\text{C}_6\text{D}_6$ , 300 K).

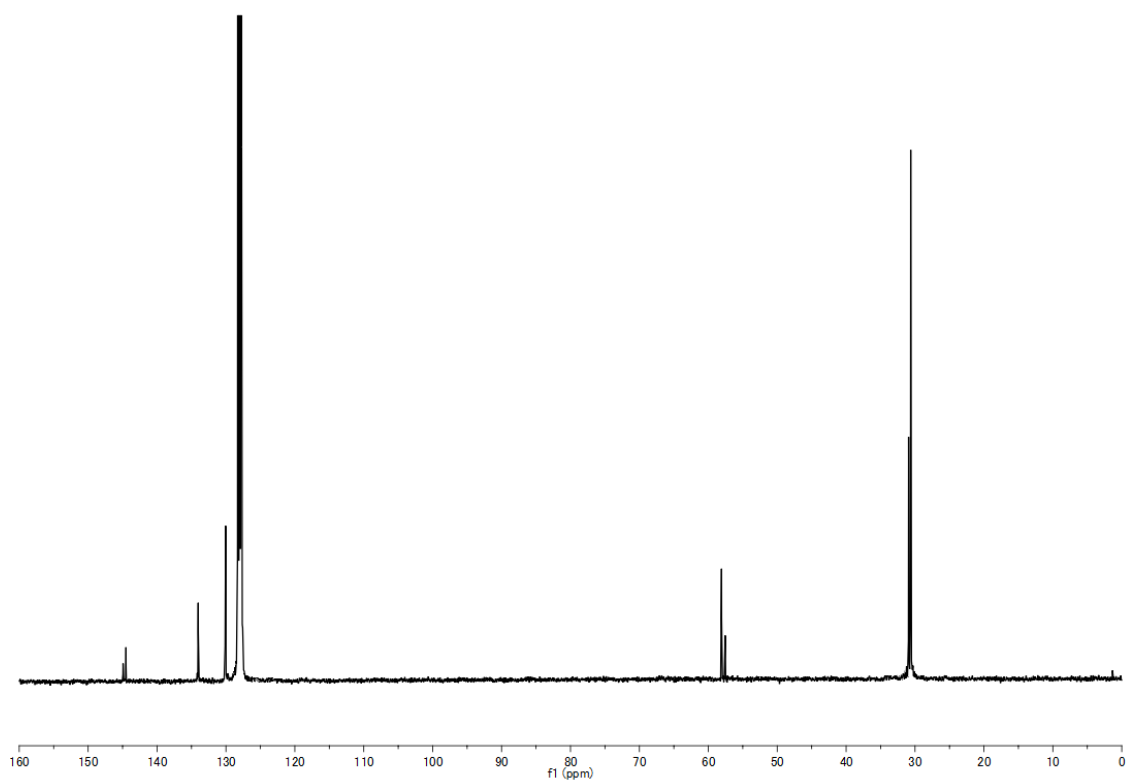

**Figure S7.**  $^{13}\text{C}\{^1\text{H}\}$  NMR chart of chlorogermylene-thione **3** (101 MHz,  $\text{C}_6\text{D}_6$ , 300 K).

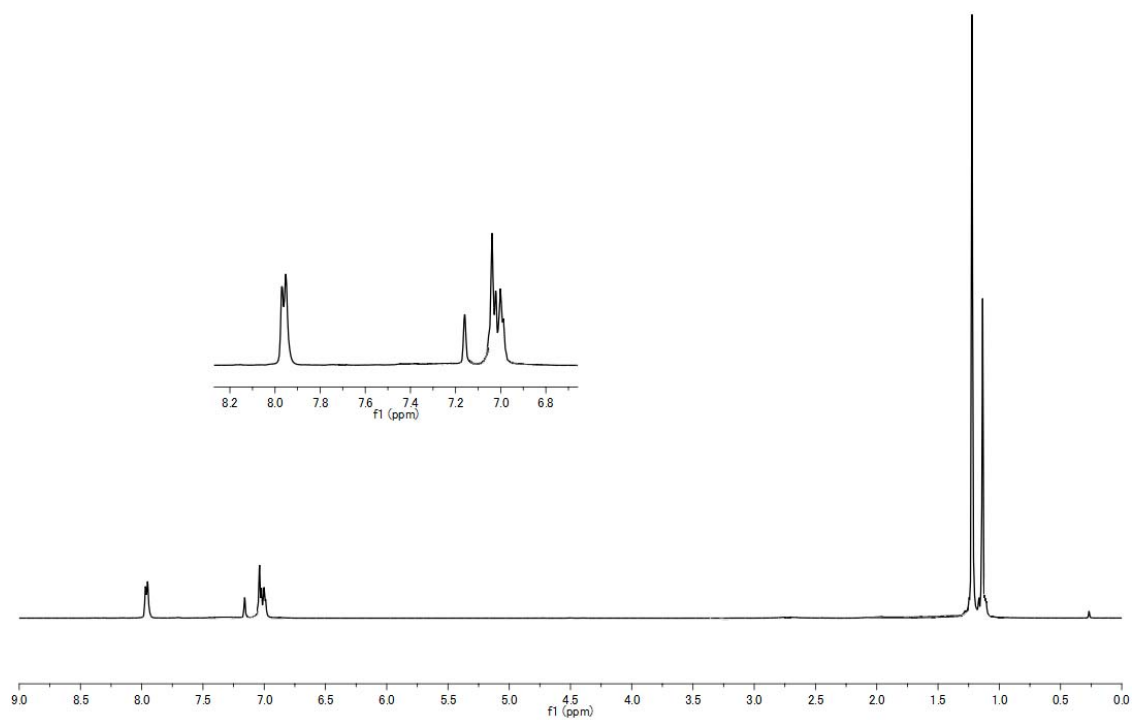

**Figure S8.**  $^1\text{H}$  NMR chart of chlorogermylene-selone **4** (400 MHz,  $\text{C}_6\text{D}_6$ , 300 K).

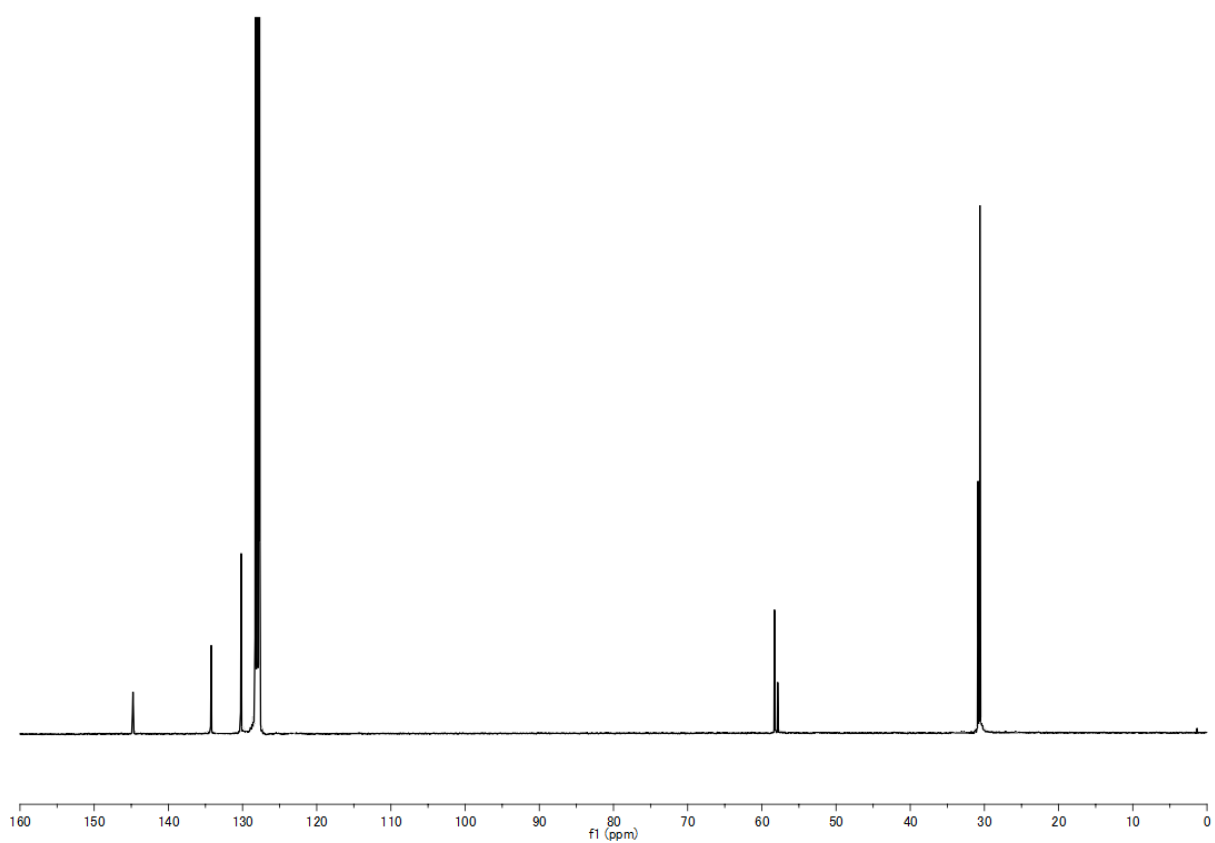

**Figure S9.**  $^{13}\text{C}\{^1\text{H}\}$  NMR chart of chlorogermylene-selone **4** (101 MHz,  $\text{C}_6\text{D}_6$ , 300 K).

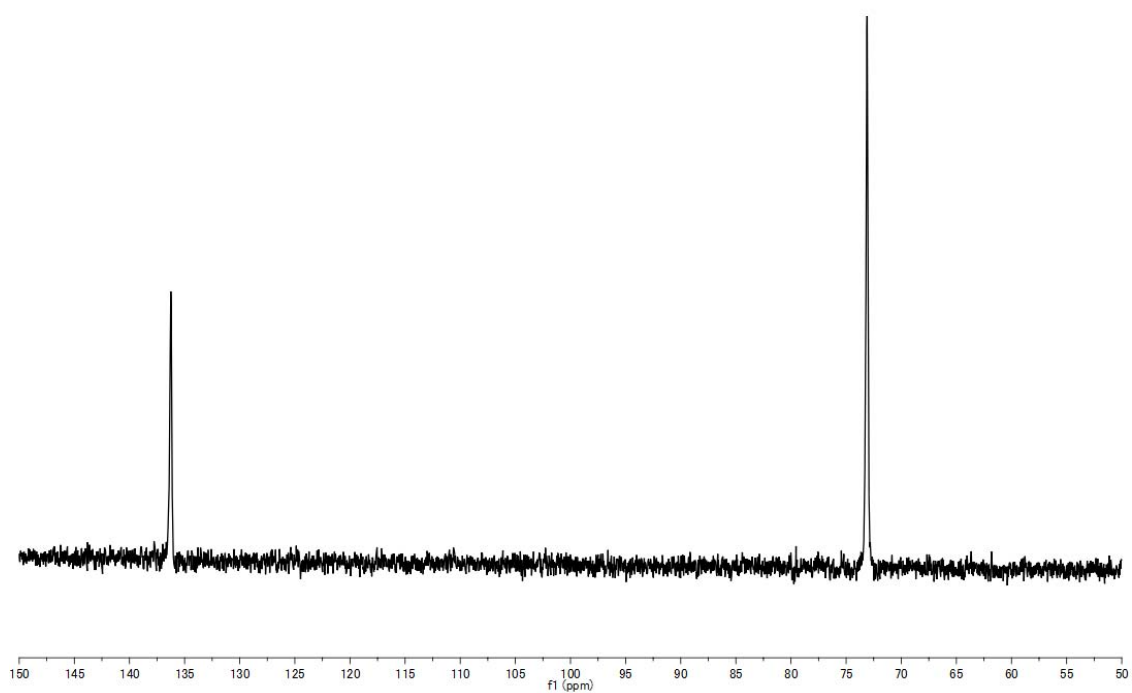

**Figure S10.**  $^{77}\text{Se}\{^1\text{H}\}$  NMR chart of chlorogermylene-selone **4** (95.4 MHz,  $\text{C}_6\text{D}_6$ , 300 K).

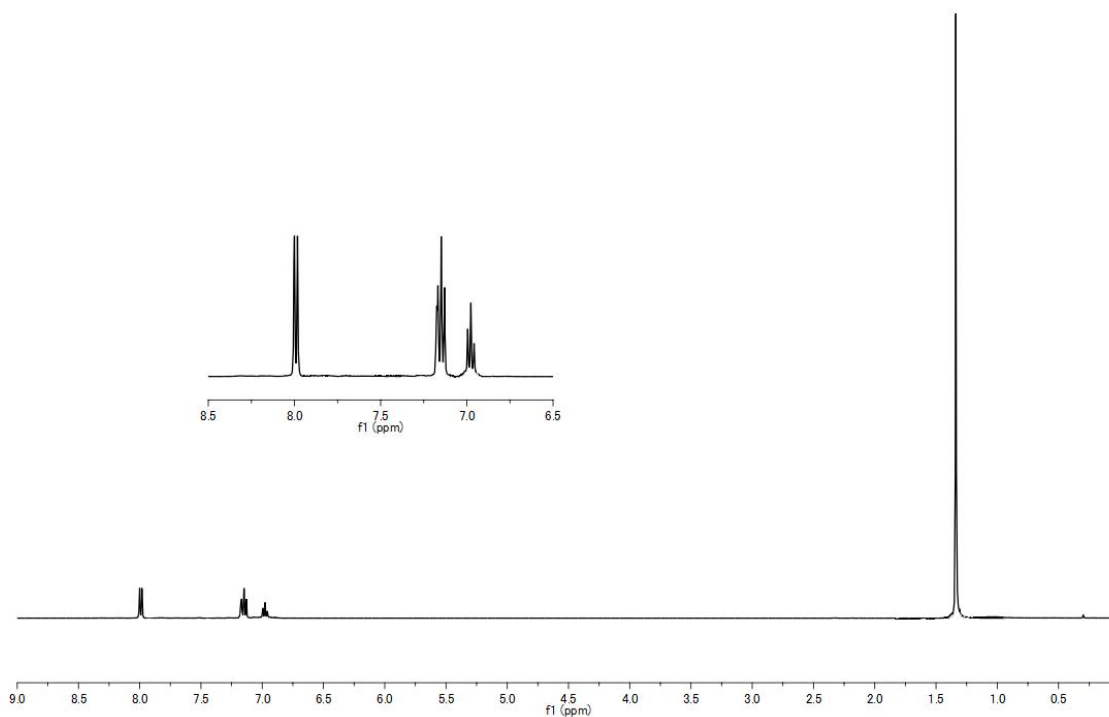

**Figure S11.**  $^1\text{H}$  NMR chart of 1,3,2,4-dithiadistannetane **5** (400 MHz,  $\text{C}_6\text{D}_6$ , 300 K).

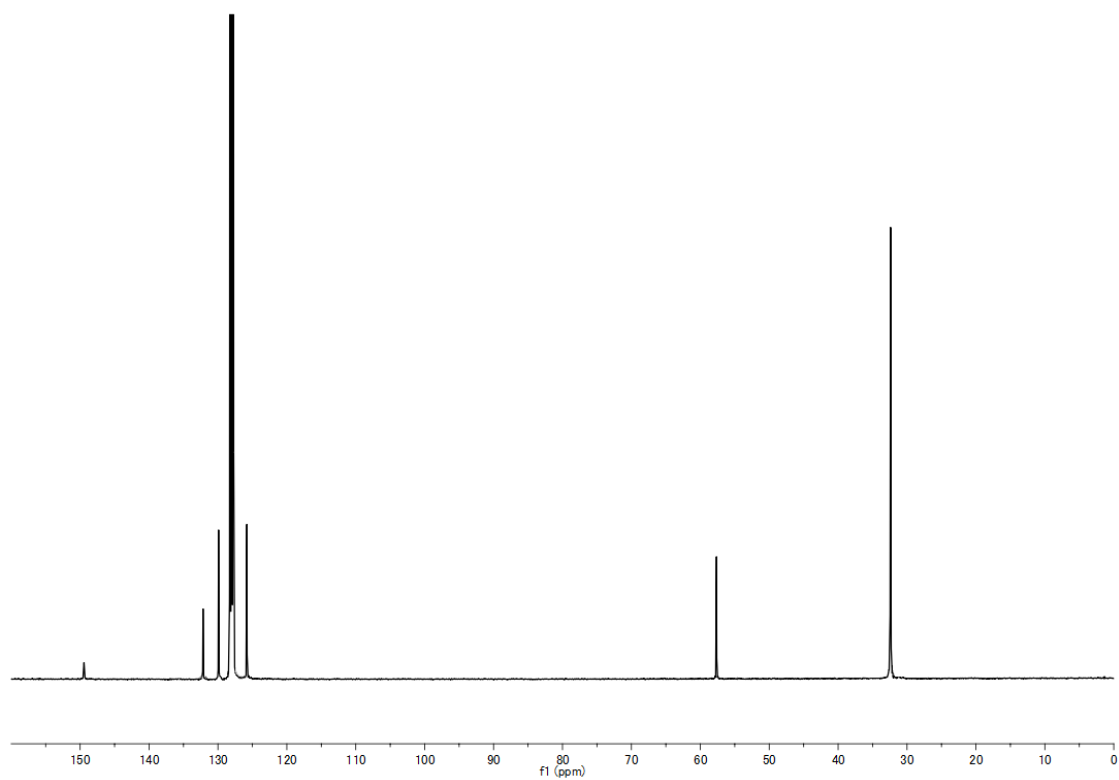

**Figure S12.**  $^{13}\text{C}\{^1\text{H}\}$  NMR chart of 1,3,2,4-dithiadistannetane **5** (101 MHz,  $\text{C}_6\text{D}_6$ , 300 K).



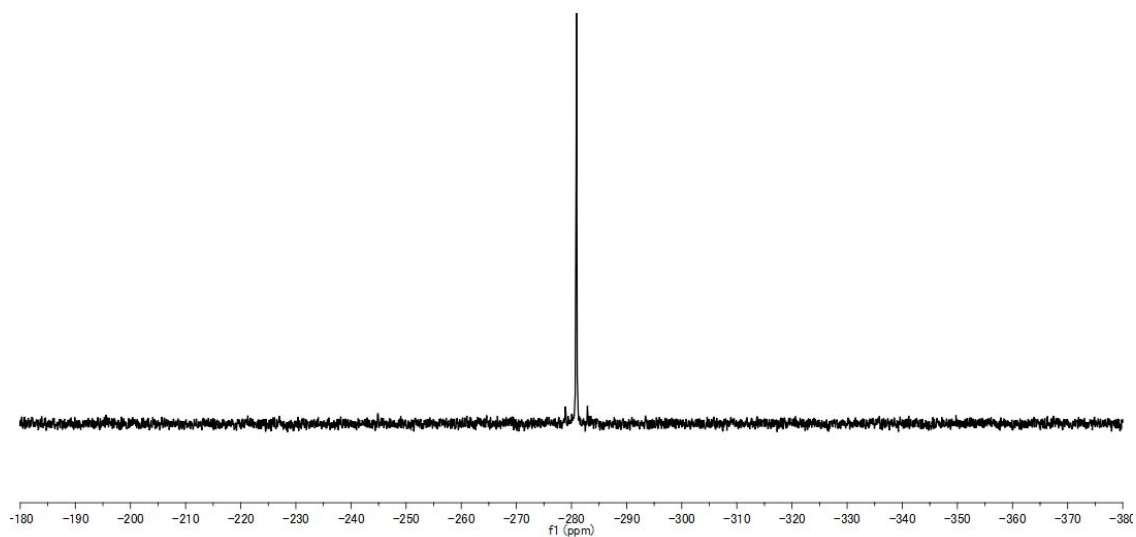

**Figure S13.**  $^{119}\text{Sn}\{^1\text{H}\}$  NMR chart of 1,3,2,4-dithiadistannetane **5** (186 MHz,  $\text{C}_6\text{D}_6$ , 300 K).

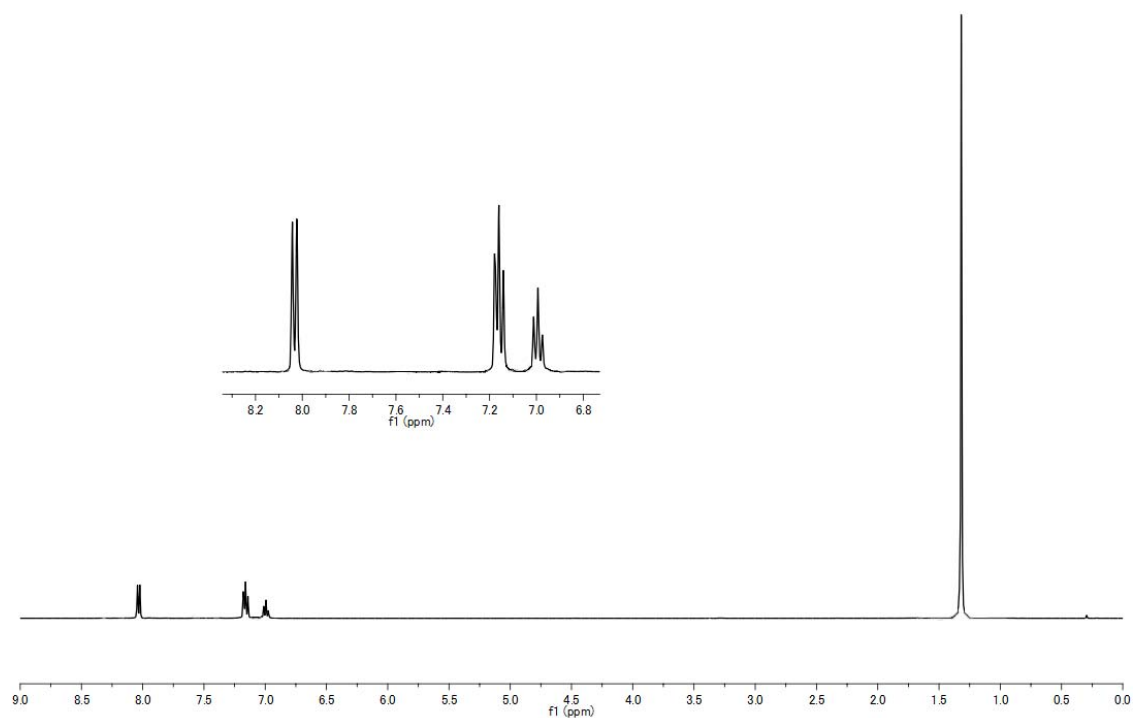

**Figure S14.**  $^1\text{H}$  NMR chart of 1,3,2,4-diselenadistannetane **6** (400 MHz,  $\text{C}_6\text{D}_6$ , 300 K).

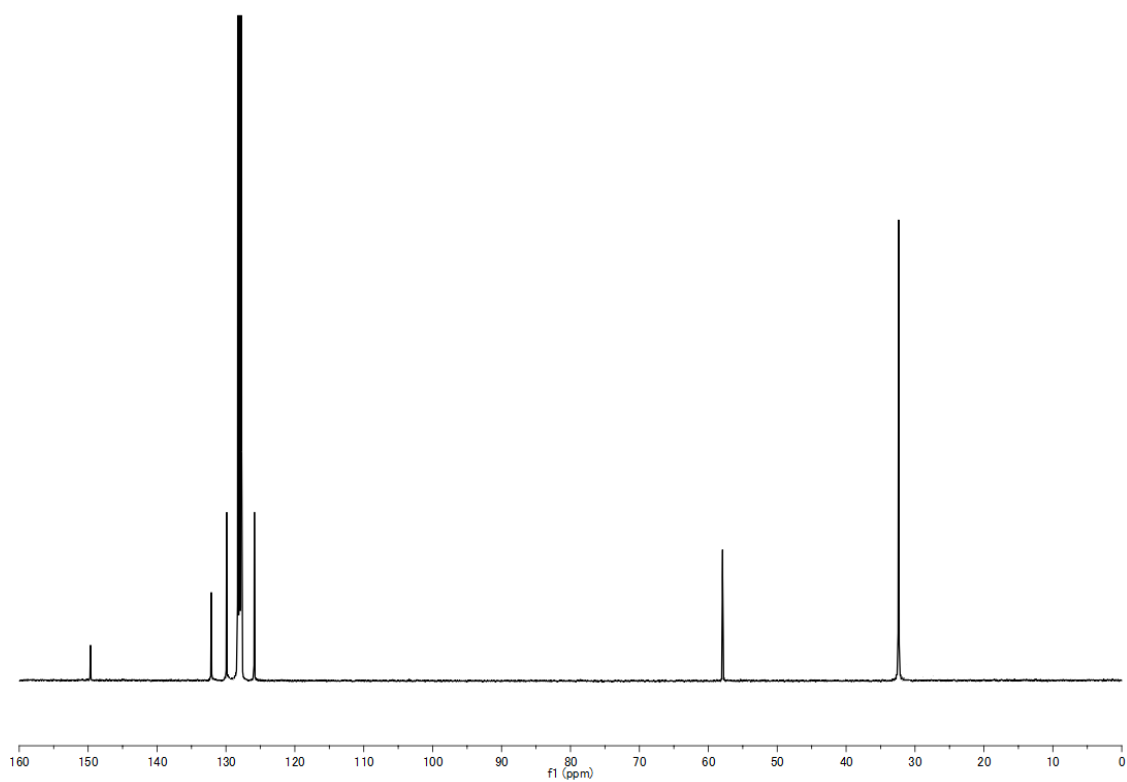

**Figure S15.**  $^{13}\text{C}\{^1\text{H}\}$  NMR chart of 1,3,2,4-diselenadistannetane **6** (101 MHz,  $\text{C}_6\text{D}_6$ , 300 K).

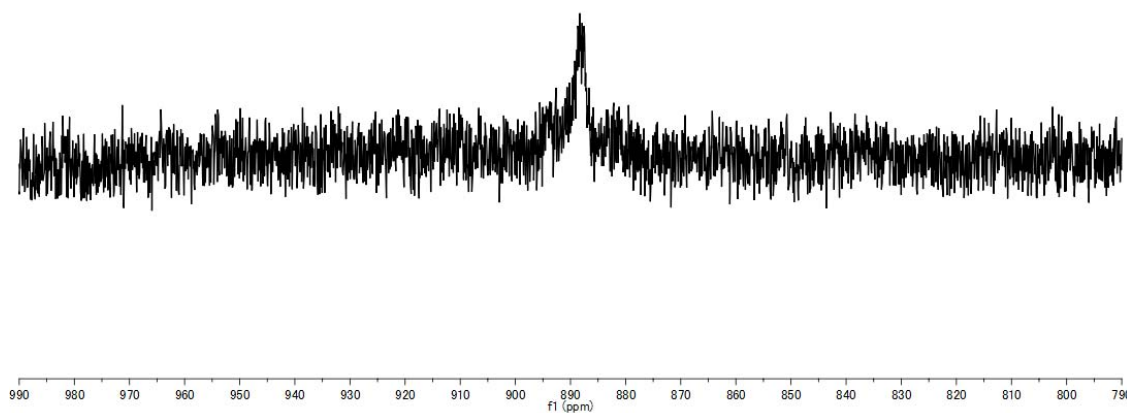

**Figure S16.**  $^{77}\text{Se}\{^1\text{H}\}$  NMR chart of 1,3,2,4-diselenadistannetane **6** (95.4 MHz,  $\text{C}_6\text{D}_6$ , 300 K).

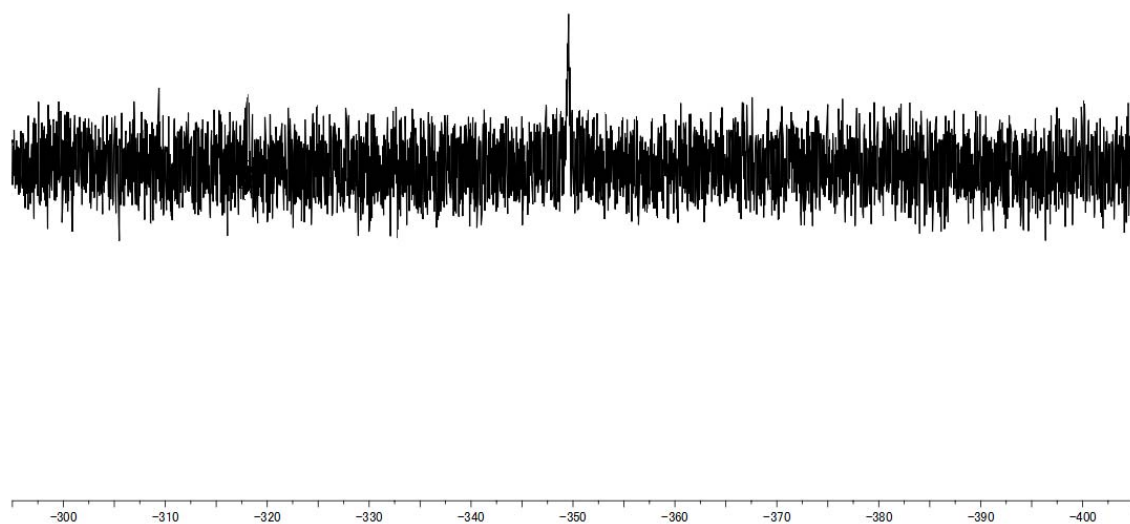

**Figure S17.**  $^{119}\text{Sn}\{^1\text{H}\}$  NMR chart of 1,3,2,4-diselenadistannetane **6** (186 MHz,  $\text{C}_6\text{D}_6$ , 300 K).

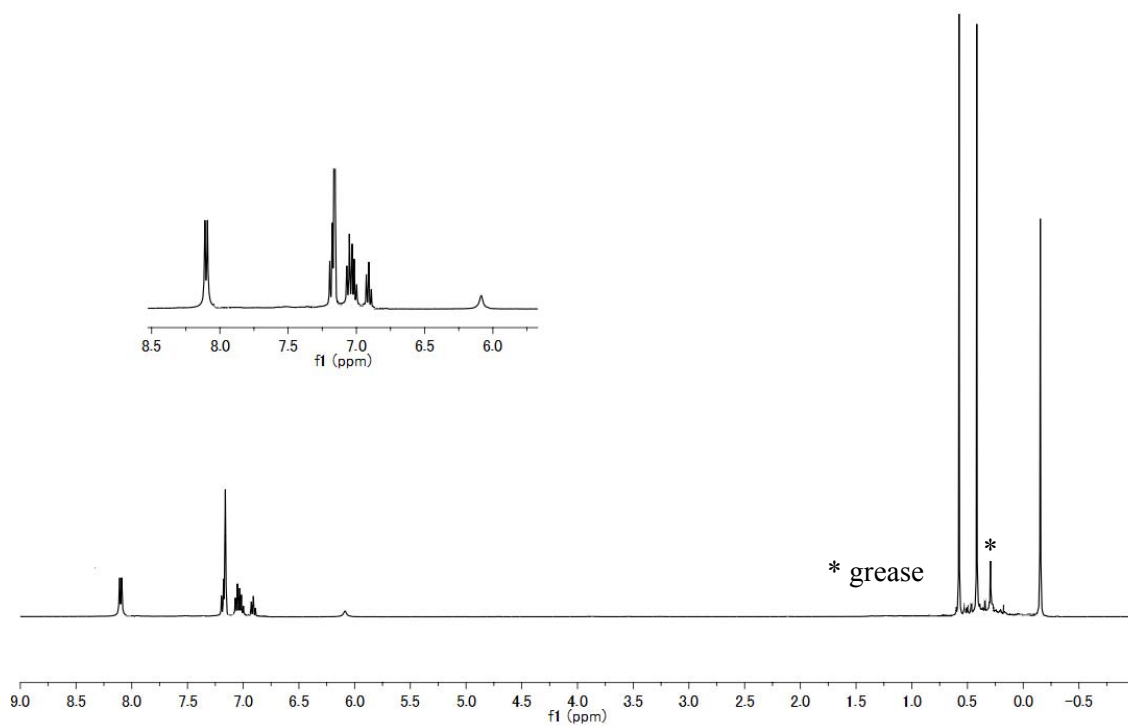

**Figure S18.**  $^1\text{H}$  NMR chart of 1,3-bis(chlorogermylene) **3** (400 MHz,  $\text{C}_6\text{D}_6$ , 300 K).

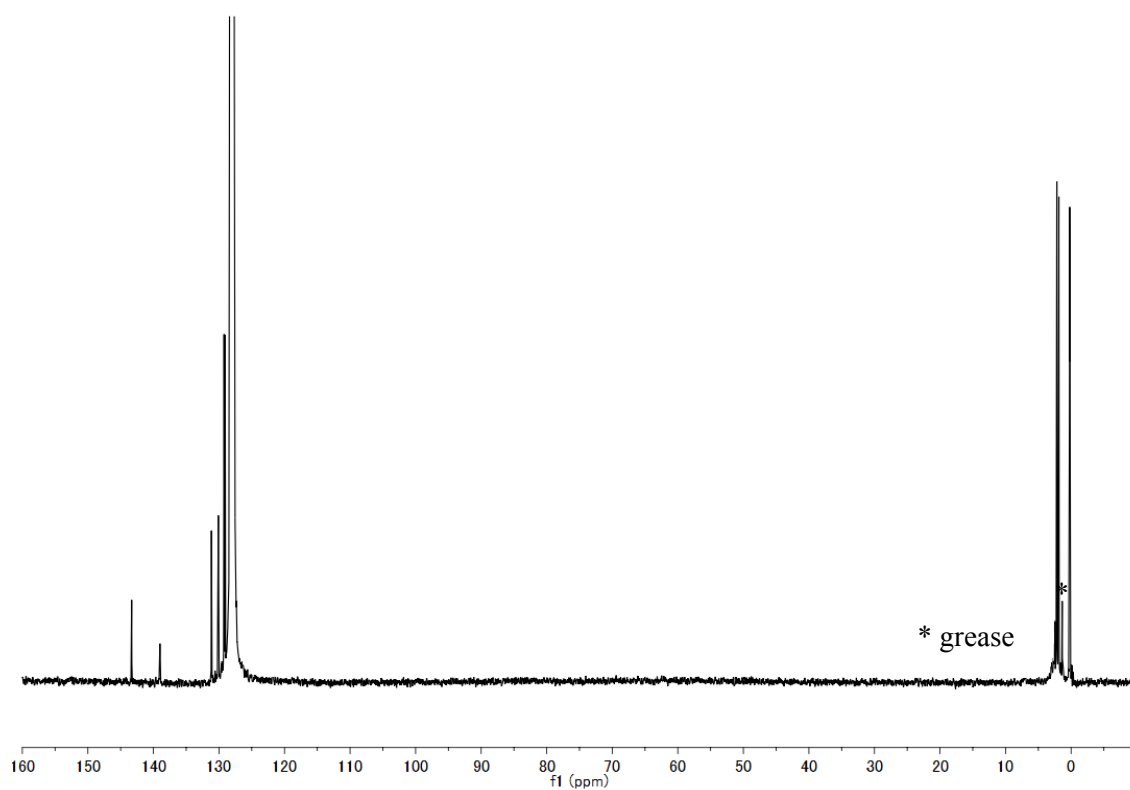

**Figure S19.**  $^{13}\text{C}\{^1\text{H}\}$  NMR chart of 1,3-bis(chlorogermylene) **3** (101 MHz,  $\text{C}_6\text{D}_6$ , 300 K).

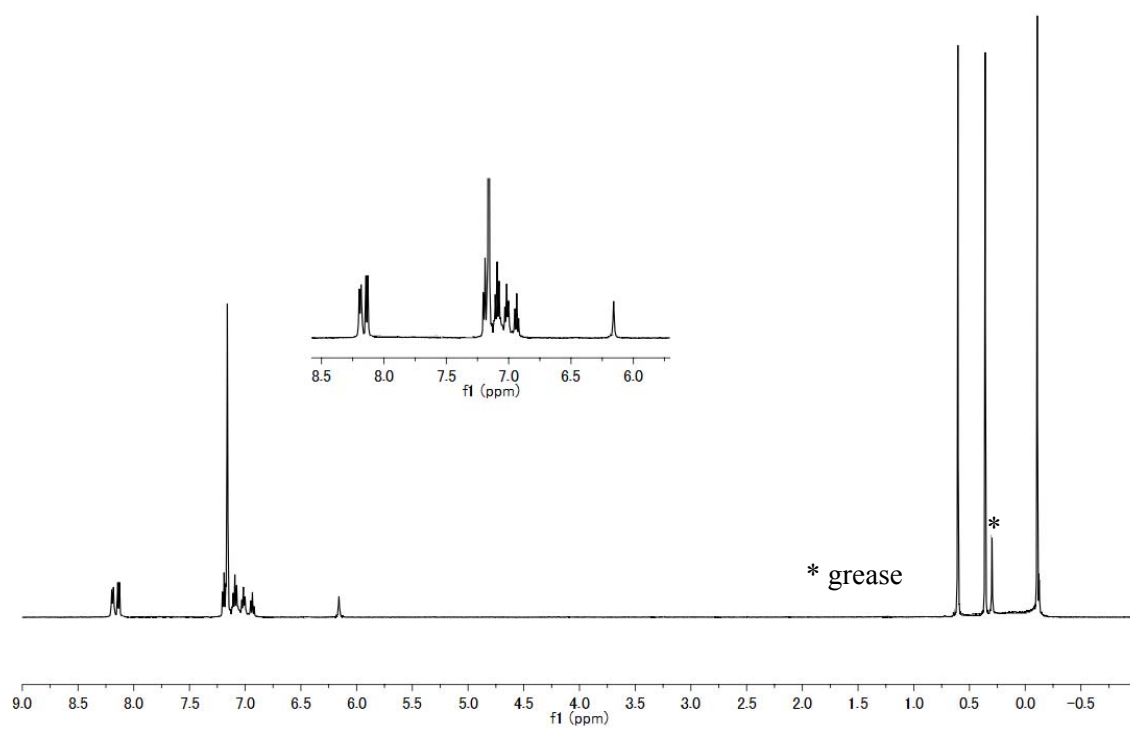

**Figure S20.**  $^1\text{H}$  NMR chart of 1,3-bis(chlorostannylene) **4** (400 MHz,  $\text{C}_6\text{D}_6$ , 300 K).

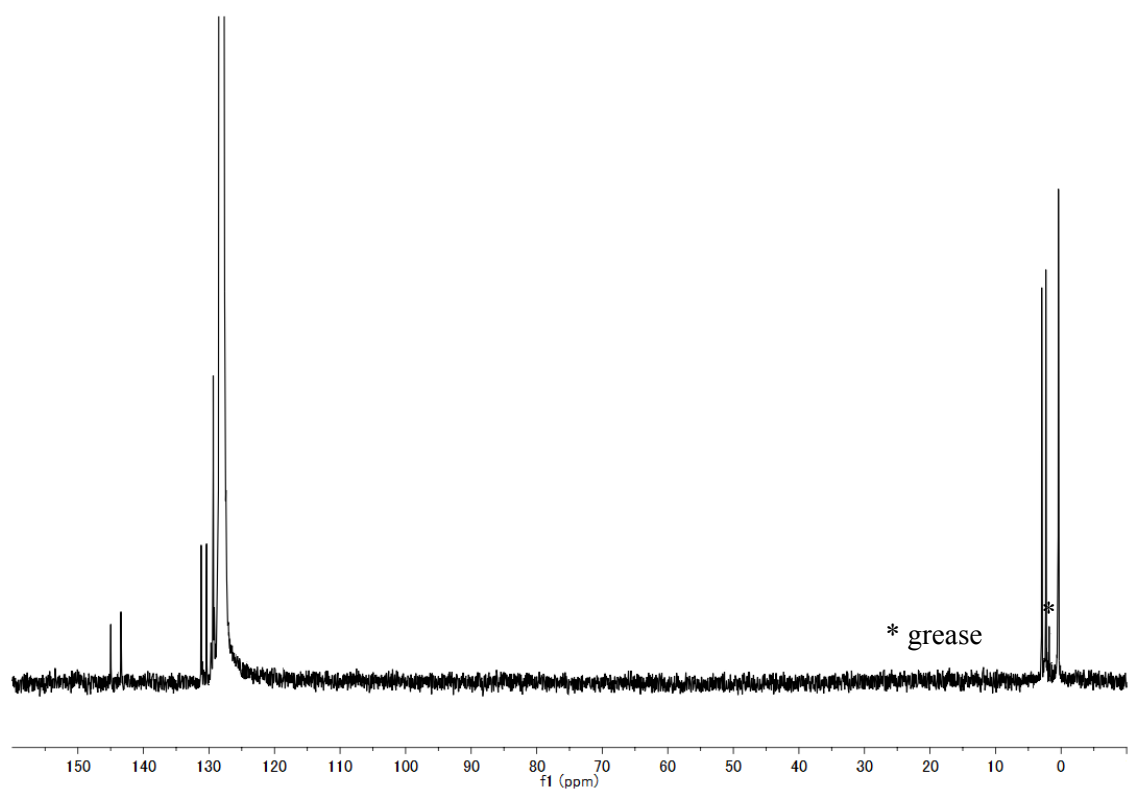

**Figure S21.**  $^{13}\text{C}\{^1\text{H}\}$  NMR chart of 1,3-bis(chlorostannylene) **4** (101 MHz,  $\text{C}_6\text{D}_6$ , 300 K).

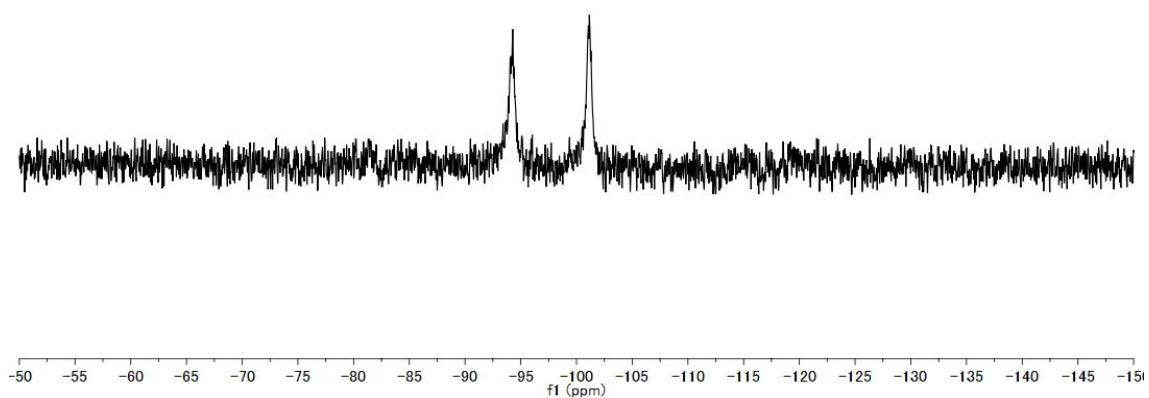

**Figure S22.**  $^{119}\text{Sn}\{^1\text{H}\}$  NMR chart of 1,3-bis(chlorostannylene) **4** (186 MHz,  $\text{C}_6\text{D}_6$ , 300 K).

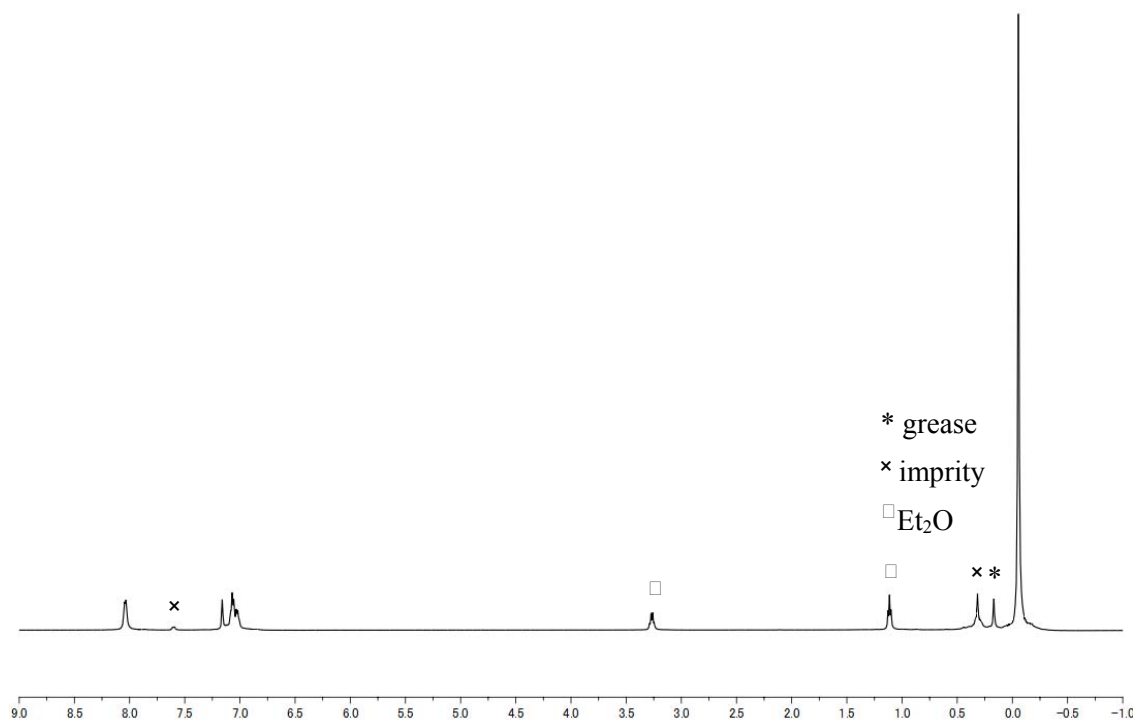

**Figure S23.**  $^1\text{H}$  NMR chart of intermediate **X** (500 MHz,  $\text{C}_6\text{D}_6$ , 300 K).

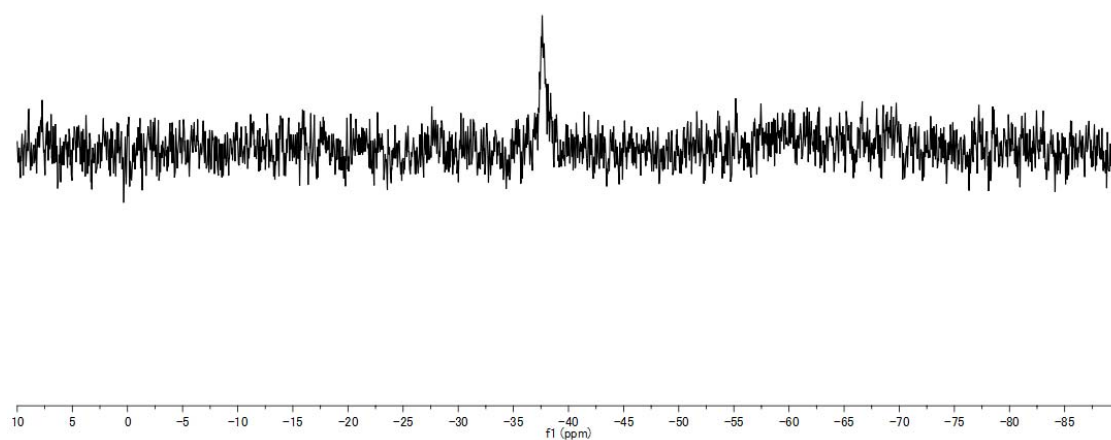

**Figure S24.**  $^{119}\text{Sn}\{^1\text{H}\}$  NMR chart of intermediate **X** (186 MHz,  $\text{C}_6\text{D}_6$ , 300 K).

**Table S1.** Crystallographic data and details of refinement for **1–8**.

|                                                             | <b>1</b>                                             | <b>2</b>                                             | <b>3</b>                                                          | <b>4</b>                                               |
|-------------------------------------------------------------|------------------------------------------------------|------------------------------------------------------|-------------------------------------------------------------------|--------------------------------------------------------|
| Formula                                                     | C <sub>14</sub> H <sub>23</sub> ClGeN <sub>2</sub> S | C <sub>14</sub> H <sub>23</sub> ClN <sub>2</sub> SSn | C <sub>14</sub> H <sub>23</sub> ClGeN <sub>2</sub> S <sub>2</sub> | C <sub>14</sub> H <sub>23</sub> ClGeN <sub>2</sub> SSe |
| Formula weight                                              | 359.44                                               | 405.54                                               | 391.50                                                            | 438.40                                                 |
| Color                                                       | pale yellow                                          | pale yellow                                          | pale yellow                                                       | yellow                                                 |
| Crystal size / mm                                           | 0.06 × 0.06 × 0.05                                   | 0.09 × 0.07 × 0.06                                   | 0.22 × 0.21 × 0.21                                                | 0.16 × 0.09 × 0.09                                     |
| Temperature / K                                             | 100                                                  | 100                                                  | 100                                                               | 100                                                    |
| Crystal system                                              | monoclinic                                           | orthorhombic                                         | orthorhombic                                                      | monoclinic                                             |
| Space group                                                 | <i>P</i> 2 <sub>1</sub> / <i>c</i>                   | <i>Pnma</i>                                          | <i>P</i> 2 <sub>1</sub> 2 <sub>1</sub> 2 <sub>1</sub>             | <i>P</i> 2 <sub>1</sub> / <i>n</i>                     |
| <i>a</i> / Å                                                | 13.004(4)                                            | 11.9462(12)                                          | 10.9327(8)                                                        | 17.7011(14)                                            |
| <i>b</i> / Å                                                | 11.372(4)                                            | 12.6983(13)                                          | 12.4204(9)                                                        | 11.7652(9)                                             |
| <i>c</i> / Å                                                | 11.580(4)                                            | 11.6365(11)                                          | 13.7243(9)                                                        | 18.2391(14)                                            |
| <i>a</i> / deg.                                             | 90                                                   | 90                                                   | 90                                                                | 90                                                     |
| <i>b</i> / deg.                                             | 94.447(4)                                            | 90                                                   | 90                                                                | 99.3550(10)                                            |
| <i>g</i> / deg.                                             | 90                                                   | 90                                                   | 90                                                                | 90                                                     |
| <i>V</i> / Å <sup>3</sup>                                   | 1707.3(9)                                            | 1765.2(3)                                            | 1863.6(2)                                                         | 3747.9(5)                                              |
| <i>Z</i>                                                    | 4                                                    | 4                                                    | 4                                                                 | 8                                                      |
| <i>D</i> <sub>calcd</sub> / g cm <sup>-3</sup>              | 1.398                                                | 1.526                                                | 1.395                                                             | 1.554                                                  |
| No. of unique data                                          | 3110                                                 | 1903                                                 | 3824                                                              | 7714                                                   |
| No. of parameters                                           | 178                                                  | 103                                                  | 187                                                               | 373                                                    |
| No. of restraints                                           | 0                                                    | 0                                                    | 0                                                                 | 0                                                      |
| <i>R</i> <sub>1</sub> ( <i>I</i> > 2 <i>s</i> ( <i>I</i> )) | 0.0710                                               | 0.0197                                               | 0.0290                                                            | 0.0216                                                 |
| <i>wR</i> <sub>2</sub> (all data)                           | 0.1994                                               | 0.0534                                               | 0.0735                                                            | 0.0482                                                 |
| GOF                                                         | 1.075                                                | 1.013                                                | 1.048                                                             | 1.031                                                  |

|                                                             | <b>5</b>                                                                                      | <b>6</b>                                                                                                      | <b>7</b>                                                                                                      | <b>8</b>                                                                                                      |
|-------------------------------------------------------------|-----------------------------------------------------------------------------------------------|---------------------------------------------------------------------------------------------------------------|---------------------------------------------------------------------------------------------------------------|---------------------------------------------------------------------------------------------------------------|
| Formula                                                     | C <sub>34</sub> H <sub>52</sub> Cl <sub>2</sub> N <sub>4</sub> S <sub>4</sub> Sn <sub>2</sub> | C <sub>34</sub> H <sub>52</sub> Cl <sub>2</sub> N <sub>4</sub> S <sub>2</sub> Se <sub>4</sub> Sn <sub>2</sub> | C <sub>21</sub> H <sub>38</sub> Cl <sub>2</sub> Ge <sub>2</sub> N <sub>4</sub> S <sub>2</sub> Si <sub>3</sub> | C <sub>21</sub> H <sub>38</sub> Cl <sub>2</sub> N <sub>4</sub> S <sub>2</sub> Si <sub>3</sub> Sn <sub>2</sub> |
| Formula weight                                              | 953.32                                                                                        | 1047.12                                                                                                       | 711.02                                                                                                        | 803.22                                                                                                        |
| Color                                                       | Yellow                                                                                        | Yellow                                                                                                        | colorless                                                                                                     | colorless                                                                                                     |
| Crystal size / mm                                           | 0.04 × 0.04 × 0.03                                                                            | 0.09 × 0.08 × 0.07                                                                                            | 0.09 × 0.08 × 0.05                                                                                            | 0.21 × 0.14 × 0.13                                                                                            |
| Temperature / K                                             | 100                                                                                           | 100                                                                                                           | 100                                                                                                           | 100                                                                                                           |
| Crystal system                                              | Monoclinic                                                                                    | Monoclinic                                                                                                    | triclinic                                                                                                     | triclinic                                                                                                     |
| Space group                                                 | <i>P</i> 2 <sub>1</sub> / <i>c</i>                                                            | <i>P</i> 2 <sub>1</sub> / <i>c</i>                                                                            | <i>P</i> -1                                                                                                   | <i>P</i> -1                                                                                                   |
| <i>a</i> / Å                                                | 12.9068(10)                                                                                   | 13.0087(12)                                                                                                   | 10.372(2)                                                                                                     | 10.5769(19)                                                                                                   |
| <i>b</i> / Å                                                | 11.6435(9)                                                                                    | 11.6396(10)                                                                                                   | 10.737(2)                                                                                                     | 10.7781(19)                                                                                                   |
| <i>c</i> / Å                                                | 11.1347(11)                                                                                   | 14.1127(13)                                                                                                   | 16.616(4)                                                                                                     | 16.372(3)                                                                                                     |
| <i>a</i> / deg.                                             | 90                                                                                            | 90                                                                                                            | 106.556(3)                                                                                                    | 106.544(2)                                                                                                    |
| <i>b</i> / deg.                                             | 95.8210(10)                                                                                   | 96.0450(10)                                                                                                   | 97.759(3)                                                                                                     | 92.127(2)                                                                                                     |
| <i>g</i> / deg.                                             | 90                                                                                            | 90                                                                                                            | 108.288(2)                                                                                                    | 107.936(2)                                                                                                    |
| <i>V</i> / Å <sup>3</sup>                                   | 2113.2(3)                                                                                     | 2125.0(3)                                                                                                     | 1632.1(6)                                                                                                     | 1686.2(5)                                                                                                     |
| <i>Z</i>                                                    | 2                                                                                             | 2                                                                                                             | 2                                                                                                             | 2                                                                                                             |
| <i>D</i> <sub>calcd</sub> / g cm <sup>-3</sup>              | 1.498                                                                                         | 1.636                                                                                                         | 1.447                                                                                                         | 1.582                                                                                                         |
| No. of unique data                                          | 3907                                                                                          | 4386                                                                                                          | 5854                                                                                                          | 6467                                                                                                          |
| No. of parameters                                           | 214                                                                                           | 214                                                                                                           | 320                                                                                                           | 320                                                                                                           |
| No. of restraints                                           | 0                                                                                             | 0                                                                                                             | 0                                                                                                             | 0                                                                                                             |
| <i>R</i> <sub>1</sub> ( <i>I</i> > 2 <i>s</i> ( <i>I</i> )) | 0.0300                                                                                        | 0.0285                                                                                                        | 0.0368                                                                                                        | 0.0300                                                                                                        |
| <i>wR</i> <sub>2</sub> (all data)                           | 0.0922                                                                                        | 0.0754                                                                                                        | 0.0789                                                                                                        | 0.0808                                                                                                        |
| GOF                                                         | 1.017                                                                                         | 1.016                                                                                                         | 1.007                                                                                                         | 1.016                                                                                                         |



## Computational details

Atomic Coordinates for *cis*-**3**.

Total Energy: -3988.47224046 hartree

|    |   |           |           |           |
|----|---|-----------|-----------|-----------|
| Ge | 0 | -1.463322 | -0.000005 | 0.657094  |
| S  | 0 | 0.684115  | 0.000011  | -1.003483 |
| N  | 0 | -0.198593 | -1.183552 | -0.182914 |
| C  | 0 | 2.293404  | -0.000000 | -0.181064 |
| C  | 0 | 3.432270  | 0.000078  | -0.987127 |
| H  | 0 | 3.339959  | 0.000145  | -2.070541 |
| C  | 0 | 4.789534  | -0.000016 | 1.011340  |
| H  | 0 | 5.768419  | -0.000022 | 1.482583  |
| N  | 0 | -0.198593 | 1.183557  | -0.182890 |
| C  | 0 | 2.375190  | -0.000089 | 1.215314  |
| H  | 0 | 1.469573  | -0.000153 | 1.816795  |
| C  | 0 | -0.323999 | -2.580719 | -0.669112 |
| C  | 0 | -1.245245 | 3.263414  | 0.359360  |
| H  | 0 | -0.860460 | 3.118979  | 1.373088  |
| H  | 0 | -2.259174 | 2.850760  | 0.324310  |
| H  | 0 | -1.306841 | 4.335900  | 0.146214  |
| C  | 0 | 1.056420  | 3.259939  | -0.657448 |
| H  | 0 | 1.745174  | 2.787295  | -1.368716 |
| H  | 0 | 1.506835  | 3.210628  | 0.338693  |
| H  | 0 | 0.960326  | 4.312581  | -0.945595 |
| C  | 0 | -0.945374 | 2.638683  | -2.075539 |
| H  | 0 | -1.922520 | 2.149119  | -2.086457 |
| H  | 0 | -0.302222 | 2.137483  | -2.809953 |
| H  | 0 | -1.068473 | 3.678088  | -2.400576 |
| C  | 0 | 4.690931  | 0.000070  | -0.380224 |
| H  | 0 | 5.587333  | 0.000131  | -0.993467 |
| C  | 0 | -1.245236 | -3.263425 | 0.359300  |
| H  | 0 | -2.259174 | -2.850796 | 0.324243  |
| H  | 0 | -0.860462 | -3.118983 | 1.373031  |
| H  | 0 | -1.306804 | -4.335912 | 0.146150  |
| C  | 0 | -0.324001 | 2.580733  | -0.669062 |
| C  | 0 | 1.056425  | -3.259918 | -0.657515 |
| H  | 0 | 1.506846  | -3.210617 | 0.338623  |
| H  | 0 | 1.745172  | -2.787262 | -1.368782 |

|    |   |           |           |           |
|----|---|-----------|-----------|-----------|
| H  | 0 | 0.960335  | -4.312557 | -0.945675 |
| C  | 0 | -0.945377 | -2.638646 | -2.075588 |
| H  | 0 | -0.302230 | -2.137429 | -2.809996 |
| H  | 0 | -1.922525 | -2.149087 | -2.086494 |
| H  | 0 | -1.068472 | -3.678046 | -2.400644 |
| C  | 0 | 3.636052  | -0.000096 | 1.805960  |
| H  | 0 | 3.721456  | -0.000165 | 2.888709  |
| Cl | 0 | -3.247633 | 0.000011  | -0.717829 |
| S  | 0 | -1.800469 | -0.000023 | 2.695960  |

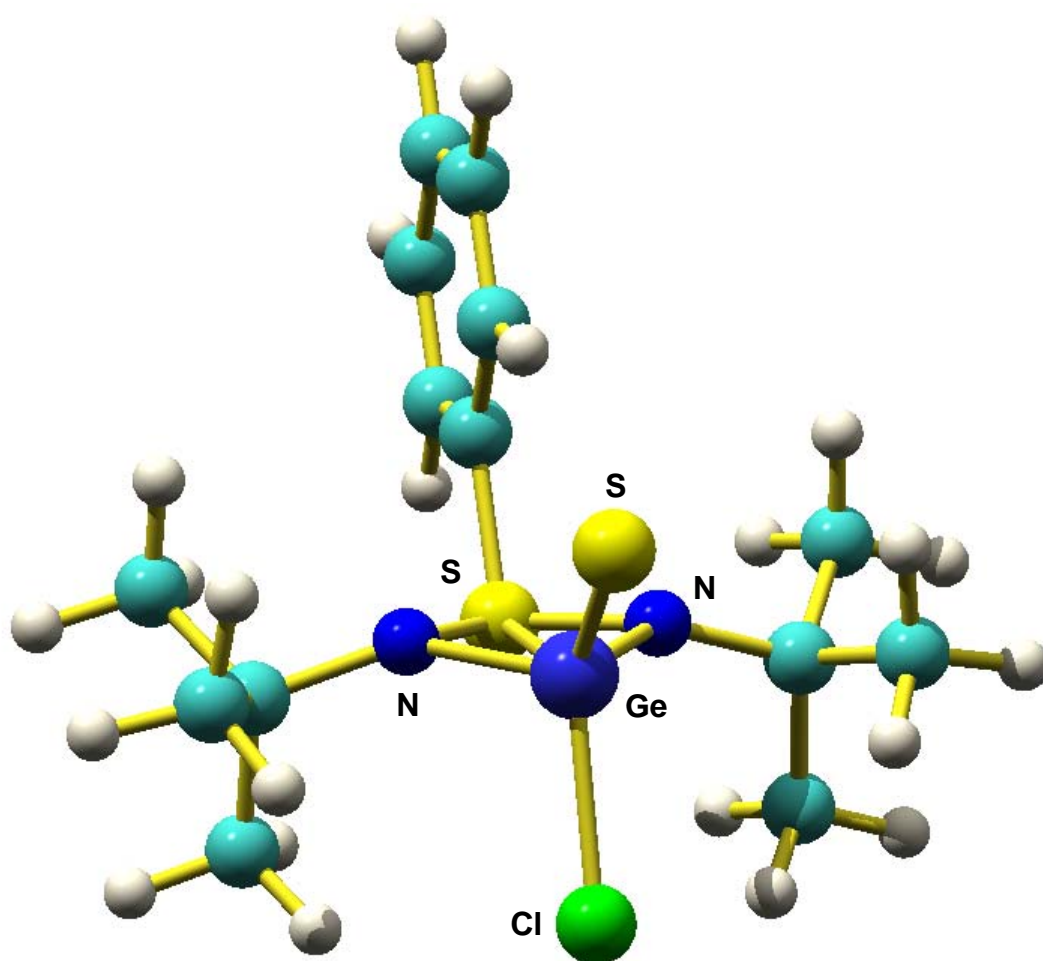

**Figure S25.** Optimized geometry of *cis-3* [B3LYP/6-31G(d) level].

Atomic Coordinates for *trans*-**3**.

Total Energy: -3988.47452445 hartree

|    |   |           |           |           |
|----|---|-----------|-----------|-----------|
| Ge | 0 | -1.530449 | 0.000200  | 0.550988  |
| S  | 0 | 0.699111  | -0.000276 | -0.971462 |
| N  | 0 | -0.187353 | -1.197549 | -0.164754 |
| C  | 0 | 2.313449  | -0.000382 | -0.171427 |
| C  | 0 | 3.434023  | -0.000563 | -1.004339 |
| H  | 0 | 3.316477  | -0.000665 | -2.085215 |
| C  | 0 | 4.839161  | -0.000495 | 0.960607  |
| H  | 0 | 5.829147  | -0.000533 | 1.408158  |
| N  | 0 | -0.187203 | 1.197284  | -0.165303 |
| C  | 0 | 2.430457  | -0.000239 | 1.222068  |
| H  | 0 | 1.541025  | -0.000112 | 1.844582  |
| C  | 0 | -0.425438 | -2.525777 | -0.800201 |
| C  | 0 | -1.255725 | 3.308309  | 0.233761  |
| H  | 0 | -0.744991 | 3.322775  | 1.201778  |
| H  | 0 | -2.244945 | 2.860172  | 0.372572  |
| H  | 0 | -1.393977 | 4.339618  | -0.108276 |
| C  | 0 | 0.922996  | 3.233880  | -1.018002 |
| H  | 0 | 1.551933  | 2.694461  | -1.737872 |
| H  | 0 | 1.475575  | 3.320724  | -0.077034 |
| H  | 0 | 0.758840  | 4.239638  | -1.420151 |
| C  | 0 | -1.192392 | 2.383894  | -2.126563 |
| H  | 0 | -2.115351 | 1.816741  | -1.973078 |
| H  | 0 | -0.583942 | 1.858343  | -2.873861 |
| H  | 0 | -1.443472 | 3.367266  | -2.540074 |
| C  | 0 | 4.706595  | -0.000630 | -0.428214 |
| H  | 0 | 5.587788  | -0.000798 | -1.063107 |
| C  | 0 | -1.257102 | -3.307939 | 0.233796  |
| H  | 0 | -2.245855 | -2.858969 | 0.373337  |
| H  | 0 | -0.745900 | -3.323483 | 1.201532  |
| H  | 0 | -1.396602 | -4.338906 | -0.108794 |
| C  | 0 | -0.424292 | 2.525881  | -0.800286 |
| C  | 0 | 0.921372  | -3.234585 | -1.018429 |
| H  | 0 | 1.474329  | -3.321630 | -0.077701 |
| H  | 0 | 1.550317  | -2.695637 | -1.738645 |
| H  | 0 | 0.756492  | -4.240312 | -1.420368 |
| C  | 0 | -1.193747 | -2.382920 | -2.126254 |

|    |   |           |           |           |
|----|---|-----------|-----------|-----------|
| H  | 0 | -0.585141 | -1.857461 | -2.873490 |
| H  | 0 | -2.116373 | -1.815328 | -1.972449 |
| H  | 0 | -1.445395 | -3.366034 | -2.540039 |
| C  | 0 | 3.705155  | -0.000298 | 1.782081  |
| H  | 0 | 3.816245  | -0.000195 | 2.862587  |
| S  | 0 | -3.517258 | 0.000564  | -0.046645 |
| Cl | 0 | -1.120982 | 0.000139  | 2.746030  |

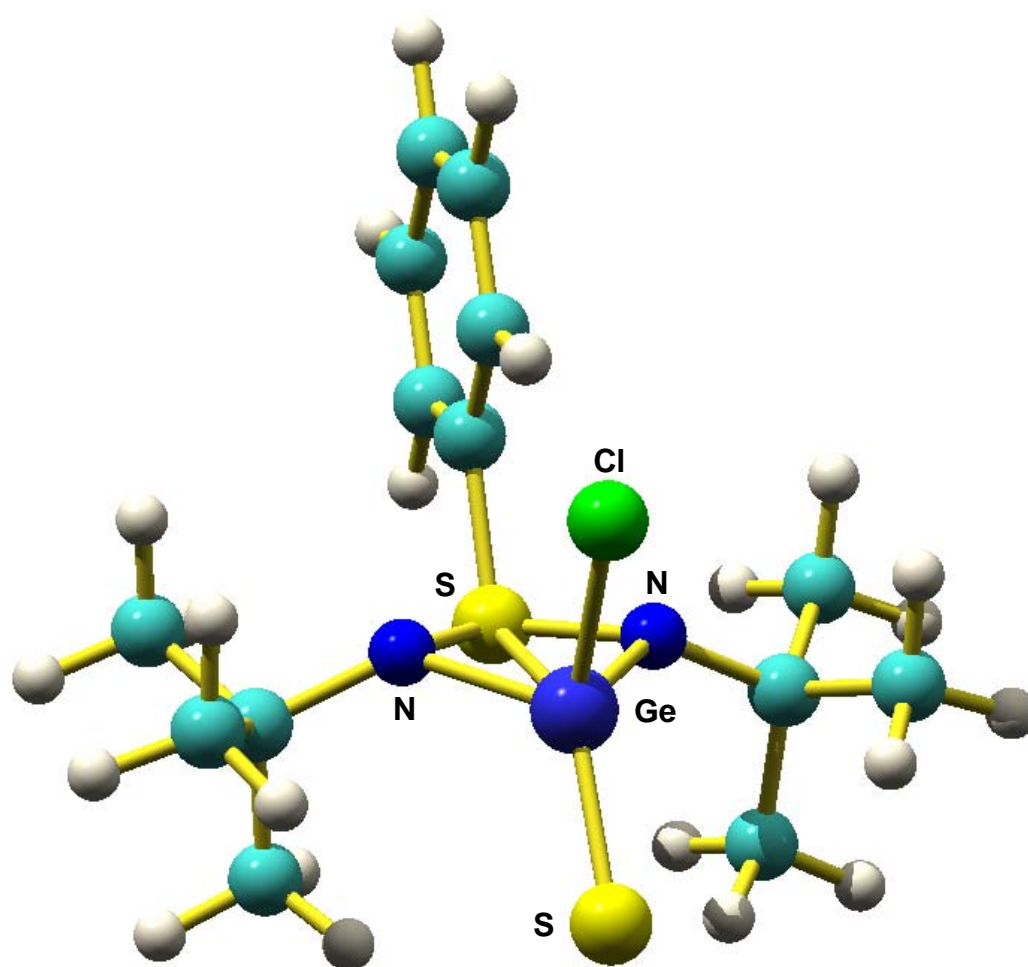

**Figure S26.** Optimized geometry of *trans*-**3** [B3LYP/6-31G(d) level].
